# Supplementary material for: Let them eat fruit! The effect of fruit and vegetable consumption on psychological well-being in young adults: A randomized controlled trial
Source: PLOS journal article supplement (doi:10.1371/journal.pone.0171206), 2017-02-03
Supplement: S4 (10.1371/journal.pone.0171206.s004) [file journal.pone.0171206.s004]

## Supplementary Analyses for Conner, Brookie, Carr, Mainvil, Visser

### Mood

This section presents the results of supplementary analyses testing the three negative mood items (*sad*, *anxious*, *angry*) and three positive mood items (*relaxed*, *happy*, *enthusiastic*) separately. Results are shown in Table S2-a. *Happy* showed significant group differences in change over time ( $p = .008$ ). Analysis of simple slopes showed that happiness was stable over time for participants in the fruit and vegetable intervention (FVI) condition ( $B(SE) = -0.001(0.006)$ ,  $p = .845$ ), but decreased for participants in the ecological momentary intervention (EMI) condition ( $B(SE) = -0.034(0.010)$ ,  $p = 0.001$ ) and control condition ( $B(SE) = -0.012(0.008)$ ,  $p = 0.018$ ). The slopes were significantly different only between the FVI and EMI conditions ( $p = 0.008$ ).

**Table S2-a. Results from growth curve multilevel modelling testing for changes in the six mood outcomes across the two week intervention period and differences between the control, ecological momentary intervention (EMI), and fruit and vegetable intervention (FVI) conditions. Significant intervention effects are bolded.**

| Mood Outcome    |     |        |       |         |            |        |       |       |
|-----------------|-----|--------|-------|---------|------------|--------|-------|-------|
| Sad             | G   | Coef   | SE    | p       |            | Coef   | SE    | p     |
| Control Day 1   | G00 | 0.576  | 0.079 | < 0.001 |            |        |       |       |
| EMI Day 1 diff  | G01 | 0.022  | 0.114 | 0.849   |            |        |       |       |
| FVI Day 1 diff  | G02 | 0.137  | 0.108 | 0.204   |            |        |       |       |
| Ethnicity       | G03 | 0.027  | 0.090 | 0.767   |            |        |       |       |
| Control Change  | G10 | 0.013  | 0.008 | 0.089   |            |        |       |       |
| EMI Change diff | G11 | -0.004 | 0.012 | 0.760   | EMI Δ      | 0.010  | 0.009 | 0.287 |
| FVI Change diff | G12 | -0.016 | 0.011 | 0.144   | FVI Δ diff | -0.012 | 0.012 | 0.303 |
| Anxious         | G   | Coef   | SE    | p       |            |        |       |       |
| Control Day 1   | G00 | 1.103  | 0.113 | < 0.001 |            |        |       |       |
| EMI Day 1 diff  | G01 | -0.120 | 0.140 | 0.391   |            |        |       |       |
| FVI Day 1 diff  | G02 | 0.008  | 0.143 | 0.955   |            |        |       |       |
| Ethnicity       | G03 | -0.120 | 0.108 | 0.269   |            |        |       |       |
| Control Change  | G10 | 0.013  | 0.010 | 0.175   |            |        |       |       |
| EMI Change diff | G11 | -0.006 | 0.015 | 0.657   | EMI Δ      | 0.007  | 0.011 | 0.568 |
| FVI Change diff | G12 | -0.015 | 0.012 | 0.243   | FVI Δ diff | -0.008 | 0.014 | 0.563 |
| Angry           | G   | Coef   | SE    | p       |            |        |       |       |
| Control Day 1   | G00 | 0.548  | 0.074 | < 0.001 |            |        |       |       |
| EMI Day 1 diff  | G01 | -0.108 | 0.104 | 0.303   |            |        |       |       |
| FVI Day 1 diff  | G02 | 0.005  | 0.102 | 0.965   |            |        |       |       |
| Ethnicity       | G03 | 0.023  | 0.076 | 0.764   |            |        |       |       |
| Control Change  | G10 | 0.006  | 0.007 | 0.470   |            |        |       |       |
| EMI Change diff | G11 | 0.006  | 0.011 | 0.575   | EMI Δ      | 0.012  | 0.008 | 0.135 |
| FVI Change diff | G12 | -0.007 | 0.010 | 0.466   | FVI Δ diff | -0.006 | 0.011 | 0.575 |

| Relaxed                     | G   | Coef   | SE    | p       |                                     | Coef         | SE           | p            |
|-----------------------------|-----|--------|-------|---------|-------------------------------------|--------------|--------------|--------------|
| Control Day 1               | G00 | 1.941  | 0.111 | < 0.001 |                                     |              |              |              |
| EMI Day 1 diff              | G01 | 0.323  | 0.144 | 0.026   |                                     |              |              |              |
| FVI Day 1 diff              | G02 | 0.108  | 0.131 | 0.819   |                                     |              |              |              |
| Ethnicity                   | G03 | -0.067 | 0.094 | 0.478   |                                     |              |              |              |
| Control Change ( $\Delta$ ) | G10 | -0.018 | 0.011 | 0.096   |                                     |              |              |              |
| EMI Change diff             | G11 | -0.008 | 0.016 | 0.606   | EMI $\Delta$                        | -0.026       | 0.011        | 0.024        |
| FVI Change diff             | G12 | -0.009 | 0.014 | 0.487   | FVI $\Delta$ diff                   | -0.001       | 0.014        | 0.929        |
| Happy                       | G   | Coef   | SE    | p       |                                     |              |              |              |
| Control Day 1               | G00 | 2.632  | 0.083 | < 0.001 |                                     |              |              |              |
| EMI Day 1 diff              | G01 | 0.072  | 0.125 | 0.567   |                                     |              |              |              |
| FVI Day 1 diff              | G02 | -0.114 | 0.101 | 0.262   |                                     |              |              |              |
| Ethnicity                   | G03 | -0.195 | 0.087 | 0.026   |                                     |              |              |              |
| Control Change              | G10 | -0.020 | 0.008 | 0.018   |                                     |              |              |              |
| EMI Change diff             | G11 | -0.014 | 0.013 | 0.292   | EMI $\Delta$                        | -0.034       | 0.010        | 0.001        |
| FVI Change diff             | G12 | 0.019  | 0.011 | 0.082   | <b>FVI <math>\Delta</math> diff</b> | <b>0.032</b> | <b>0.012</b> | <b>0.008</b> |
| Enthusiastic                | G   | Coef   | SE    | p       |                                     |              |              |              |
| Control Day 1               | G00 | 1.864  | 0.115 | < 0.001 |                                     |              |              |              |
| EMI Day 1 diff              | G01 | 0.206  | 0.153 | 0.180   |                                     |              |              |              |
| FVI Day 1 diff              | G02 | 0.035  | 0.143 | 0.809   |                                     |              |              |              |
| Ethnicity                   | G03 | -0.145 | 0.110 | 0.188   |                                     |              |              |              |
| Control Change              | G10 | -0.006 | 0.008 | 0.453   |                                     |              |              |              |
| EMI Change diff             | G11 | -0.017 | 0.014 | 0.203   | EMI $\Delta$                        | -0.024       | 0.011        | 0.025        |
| FVI Change diff             | G12 | 0.008  | 0.013 | 0.513   | FVI $\Delta$ diff                   | 0.026        | 0.014        | 0.070        |

*Note.* Coef = coefficient from Hierarchical Linear Modeling; SE = Robust standard error; diff = difference in coefficient; EMI = ecological momentary intervention condition; FVI = fruit and vegetable intervention condition;  $\Delta$  = change. Degrees of freedom were 167 for G00 – G03 and 168 for G10 – G12.

## Flourishing Behaviors

This section presents the results of supplementary analyses testing the three flourishing behavior items separately (*curious, creative, motivated*). Results are shown below in Table S2-b. Participants in the FVI condition showed significantly different growth patterns in curiosity compared to both the control condition and the EMI condition (G12 coefficients). Analysis of simple slopes showed that curiosity was stable over time for participants in FVI condition ( $B(SE) = 0.004(0.008)$ ,  $p = .631$ ) but decreased for participants in the control and EMI conditions (control  $B(SE) = -0.018(0.008)$ ,  $p = 0.018$ ; EMI  $B(SE) = -0.026(0.008)$ ,  $p = 0.001$ ). The findings for creativity showed a trend difference in the growth trajectories between the FVI and control conditions. Analysis of simple slopes showed that creativity was stable over time for all three groups, but the direction of growth (i.e., the sign of the coefficient) was positive for FVI participants ( $B(SE) = 0.013(0.009)$ ,  $p = .158$ ), neutral for EMI participants ( $B(SE) = 0.001(0.008)$ ,  $p = 0.893$ ) and negative for control participants ( $B(SE) = -0.006(0.007)$ ,  $p = 0.373$ ). Lastly, participants in the FVI group showed significant growth patterns in motivation compared to the control group. Analysis of simple slopes showed that motivation increased over time for participants in the FVI condition ( $B(SE) = 0.019(0.010)$ ,  $p = .045$ ) but was unchanged for participants in the control and EMI conditions (control  $B(SE) = -0.011(0.008)$ ,  $p = 0.218$ ; EMI  $B(SE) = -0.005(0.011)$ ,  $p = 0.652$ ). In terms of effect sizes, being assigned to the FVI condition (vs. control) predicted 10.4% of the variance in the growth in curiosity, 1.8% of the growth in creativity, and 6.0% of the growth in motivation using variance-explained effect size estimates of the time slopes (Raudenbush, & Bryk, 2002).

**Table S2-b. Results from growth curve multilevel modelling testing for changes in the three flourishing behavior outcomes across the two week intervention period and differences between the control, ecological momentary intervention (EMI), and fruit and vegetable intervention (FVI) conditions. Significant intervention effects are bolded.**

| Outcome                     |            |              |              |              |                   |               |              |              |
|-----------------------------|------------|--------------|--------------|--------------|-------------------|---------------|--------------|--------------|
| Curious                     | G          | Coef         | SE           | p            |                   | Coef          | SE           | p            |
| Control Day 1               | G00        | 1.490        | 0.115        | < 0.001      |                   |               |              |              |
| EMI Day 1 diff              | G01        | -0.014       | 0.140        | 0.923        |                   |               |              |              |
| FVI Day 1 diff              | G02        | -0.049       | 0.132        | 0.706        |                   |               |              |              |
| Ethnicity                   | G03        | 0.040        | 0.111        | 0.722        |                   |               |              |              |
| Control Change ( $\Delta$ ) | G10        | -0.018       | 0.008        | 0.018        |                   |               |              |              |
| EMI Change diff             | G11        | -0.007       | 0.011        | 0.490        | EMI $\Delta$      | <b>-0.026</b> | <b>0.008</b> | <b>0.002</b> |
| FVI Change diff             | G12        | 0.022        | 0.011        | 0.043        | FVI $\Delta$ diff | <b>0.029</b>  | <b>0.011</b> | <b>0.009</b> |
| Creative                    | G          | Coef         | SE           | p            |                   |               |              |              |
| Control Day 1               | G00        | 1.205        | 0.119        | < 0.001      |                   |               |              |              |
| EMI Day 1 diff              | G01        | -0.247       | 0.137        | 0.073        |                   |               |              |              |
| FVI Day 1 diff              | G02        | -0.105       | 0.140        | 0.457        |                   |               |              |              |
| Ethnicity                   | G03        | 0.067        | 0.111        | 0.547        |                   |               |              |              |
| Control Change              | G10        | -0.006       | 0.007        | 0.373        |                   |               |              |              |
| EMI Change diff             | G11        | 0.007        | 0.011        | 0.499        | EMI $\Delta$      | 0.001         | 0.008        | 0.893        |
| FVI Change diff             | G12        | 0.019        | 0.012        | 0.097        | FVI $\Delta$ diff | 0.012         | 0.012        | 0.344        |
| Motivated                   | G          | Coef         | SE           | p            |                   |               |              |              |
| Control Day 1               | G00        | 1.945        | 0.116        | < 0.001      |                   |               |              |              |
| EMI Day 1 diff              | G01        | 0.007        | 0.148        | 0.964        |                   |               |              |              |
| FVI Day 1 diff              | G02        | -0.177       | 0.141        | 0.212        |                   |               |              |              |
| Ethnicity                   | G03        | 0.042        | 0.104        | 0.683        |                   |               |              |              |
| Control Change              | G10        | -0.011       | 0.008        | 0.218        |                   |               |              |              |
| EMI Change diff             | G11        | 0.006        | 0.014        | 0.671        | EMI $\Delta$      | -0.005        | 0.011        | 0.652        |
| <b>FVI Change diff</b>      | <b>G12</b> | <b>0.030</b> | <b>0.013</b> | <b>0.022</b> | FVI $\Delta$ diff | 0.024         | 0.015        | 0.098        |

*Note.* Coef = coefficient from Hierarchical Linear Modeling; SE = Robust standard error; diff = difference in coefficient; EMI = ecological momentary intervention condition; FVI = fruit and vegetable intervention condition;  $\Delta$  = change. Degrees of freedom were 167 for G00 – G03 and 168 for G10 – G12.
